# Supplementary material for: Biallelic SH2B3 germline variants are associated with a neonatal myeloproliferative disease and multisystemic involvement
Source: Eur J Hum Genet. 2025 Jun 6;33(9):1127–35. doi: 10.1038/s41431-025-01877-y (PMC12402439; doi:10.1038/s41431-025-01877-y)
Supplement: Supplementary file 1 — Supplementary Material [file 41431_2025_1877_MOESM1_ESM.docx]

**BIALLELIC *SH2B3* GERMLINE VARIANTS ARE ASSOCIATED WITH A NEONATAL MYELOPROLIFERATIVE DISEASE AND MULTISYSTEMIC INVOLVEMENT**

Davide Leardini*1, Elisabetta Flex2, Elliot Stieglitz3, Sara Cerasi1, Salvatore Nicola Bertuccio4, Francesco Baccelli1, Krisztián Kállay5, Paula Kjollerstrom6, Sara Batalha6, Giovanna Carpentieri7, Lucia Pedace8, Andrea Ciolfi7, Mahmoud Hammad9, Maria Miranda10, Marta Rojas11, Anupama Rao12, Andrew J. Innes13, Martina Rudelius14, Valeria Santini15, Marco Raddi15, Kok-Hoi Teh16, Rita De Vito17, Ayami Yoshimi18, Marco Tartaglia7, Franco Locatelli8,19, Charlotte M. Niemeyer18, Riccardo Masetti1

**SUPPLEMENTARY MATERIAL**

**Supplementary Table S1:** Germline mutations of the ten patients included in the cohort presented.

**Supplementary Figure S1:** Temporal trend of platelets for the patients included in the study.

**Supplementary Table S1:** Germline mutations of the ten patients included in the cohort presented. + compound heterozygous, *in-trans* on IGV variant viewer. Variants reported for the first time are bolded. GnomAD v4.1.0 and GnomAD v3.1.2 (non-cancer).

| **ID** | **Genome**  **hg19** | **mRNA**  **NM_005475.3** | **Protein** | **dbSNP** | **Allele Frequency**  **GnomAD_exomes (GnomAD version v.4.1.0)** | **Allele Frequency gnomAD v3.1.2**  **(non-cancer)** |
| --- | --- | --- | --- | --- | --- | --- |
| P1.1 | chr12:111447482 | c.1174C>T | p.Arg392Trp | rs770836648 | 0.000006417 | Variant not found |
| P1.2 | chr12:111447482 | c.1174C>T | p.Arg392Trp | rs770836648 | 0.000006417 | Variant not found |
| P2.1 | chr12: 111446947 | c.1709>dupA | p.Asp570Lysfs*82 | N/A | N/A | N/A |
| P4.1 | chr 12:111447732 | c.1313 T>G | p.Leu438Arg | rs1458654949 | N/A | N/A |
| P5.1 | chr 12:111447483 | c.1175 G>A | p.Arg392Gln | rs953911126 | 0.000005474 | 0.00002034 |
| P6.1 | chr12:111446852 | **c.832 A>T** | **p.Lys278*** | N/A | N/A | N/A |
| P8.1 | chr12:111446853 | **c.833delA** | **p.Lys278Argfs*2** | N/A | N/A | N/A |
| P9.1 | chr12: 111447466 | **c.1159 G>T** | **p.Gly387*** | N/A | N/A | N/A |
| P3.1 | chr12:111418146 | **c.1A>G** | **p.Met1Val** | rs376261237 | 0.000001446 | Variant not found |
| P7.1 | chr12:111447506  chr12:111447491 | c.1198 G>A  **c.1183 G>A** | p.Glu400Lys+ **p.Glu395Lys+** | rs72650673  rs148636776 | 0.001510  0.0003621 | 0.0007838  0.0002007 |

**Supplementary Figure S1:** Temporal trend of platelets for the patients included in the study. Data were retrieved from medical records. Graphical presentation was performed with R studio software version 2022.12.0+353 (2022.12.0+353).
